# Supplementary material
Source: publisher figshare collection journal article supplement (https://acs.figshare.com/ndownloader/files/4487956)

Supporting Information for:

# 2-Phosphinophenolate Nickel Catalysts: Formation of Ethylene Copolymers with Isolated *sec*-Alkyl, Aryl and Functionally Substituted Alkyl Groups

Cun-Yue Guo,<sup>†‡</sup> Normen Peulecke,<sup>†</sup> Kaleswara R. Basvani,<sup>†</sup> Markus K. Kindermann,<sup>†</sup>  
and  
Joachim Heinicke<sup>\*†</sup>

<sup>[a]</sup> Prof. Dr. J. Heinicke, Dr. M. K. Kindermann, Dr. N. Peulecke, MSc K. R. Basvani  
Institut für Biochemie, Ernst-Moritz-Arndt-Universität Greifswald, Felix-Hausdorff-Str. 4, D-  
17487 Greifswald, Germany, Fax: +49 (0)3834/86-4377  
E-mail: [heinicke@uni-greifswald.de](mailto:heinicke@uni-greifswald.de)

<sup>[b]</sup> Prof. Dr. Cun-Yue Guo  
Beijing National Laboratory for Molecular Sciences (BNLMS), Laboratory of New Materials,  
Institute of Chemistry, Chinese Academy of Sciences, 2 Zhongguancun N. 1<sup>st</sup> St., Beijing  
100190, P. R. China, Fax: +86 (0)10/62559373  
E-mail: [cyguo@iccas.ac.cn](mailto:cyguo@iccas.ac.cn)

## Figures of selected NMR spectra of poly(ethylene-co-olefin)s of Table 1.

NMR spectra were measured on a Bruker ARX/Avance Spectrometer at 300.13 MHz (<sup>1</sup>H) and 75.46 MHz (<sup>13</sup>C) at 100 °C after swelling for 1d at this temperature under N<sub>2</sub>. Typically, 8.000 scans were collected for <sup>1</sup>H (acquisition time 4.9-5.4 s, delay 1.0 s) and at least 20.000 for <sup>13</sup>C NMR measurements (acquisition time 0.6-0.9 s, delay 0.1-0.4 s), the latter in the presence of 3-5 mg Cr(acac)<sub>3</sub>. Reference was *p*-CH of the solvent  $\delta(^1\text{H}) = 7.23$ ,  $\delta(^{13}\text{C}) = 126.70$  ppm.

**Figure 1:**  $^{13}\text{C}$  NMR ( $\text{C}_6\text{D}_5\text{Br}$ ) spectrum of poly(ethylene-co-4-methyl-1-pentene), obtained with catalyst **CCHH/Ni** in toluene (Table 1, entry 5).

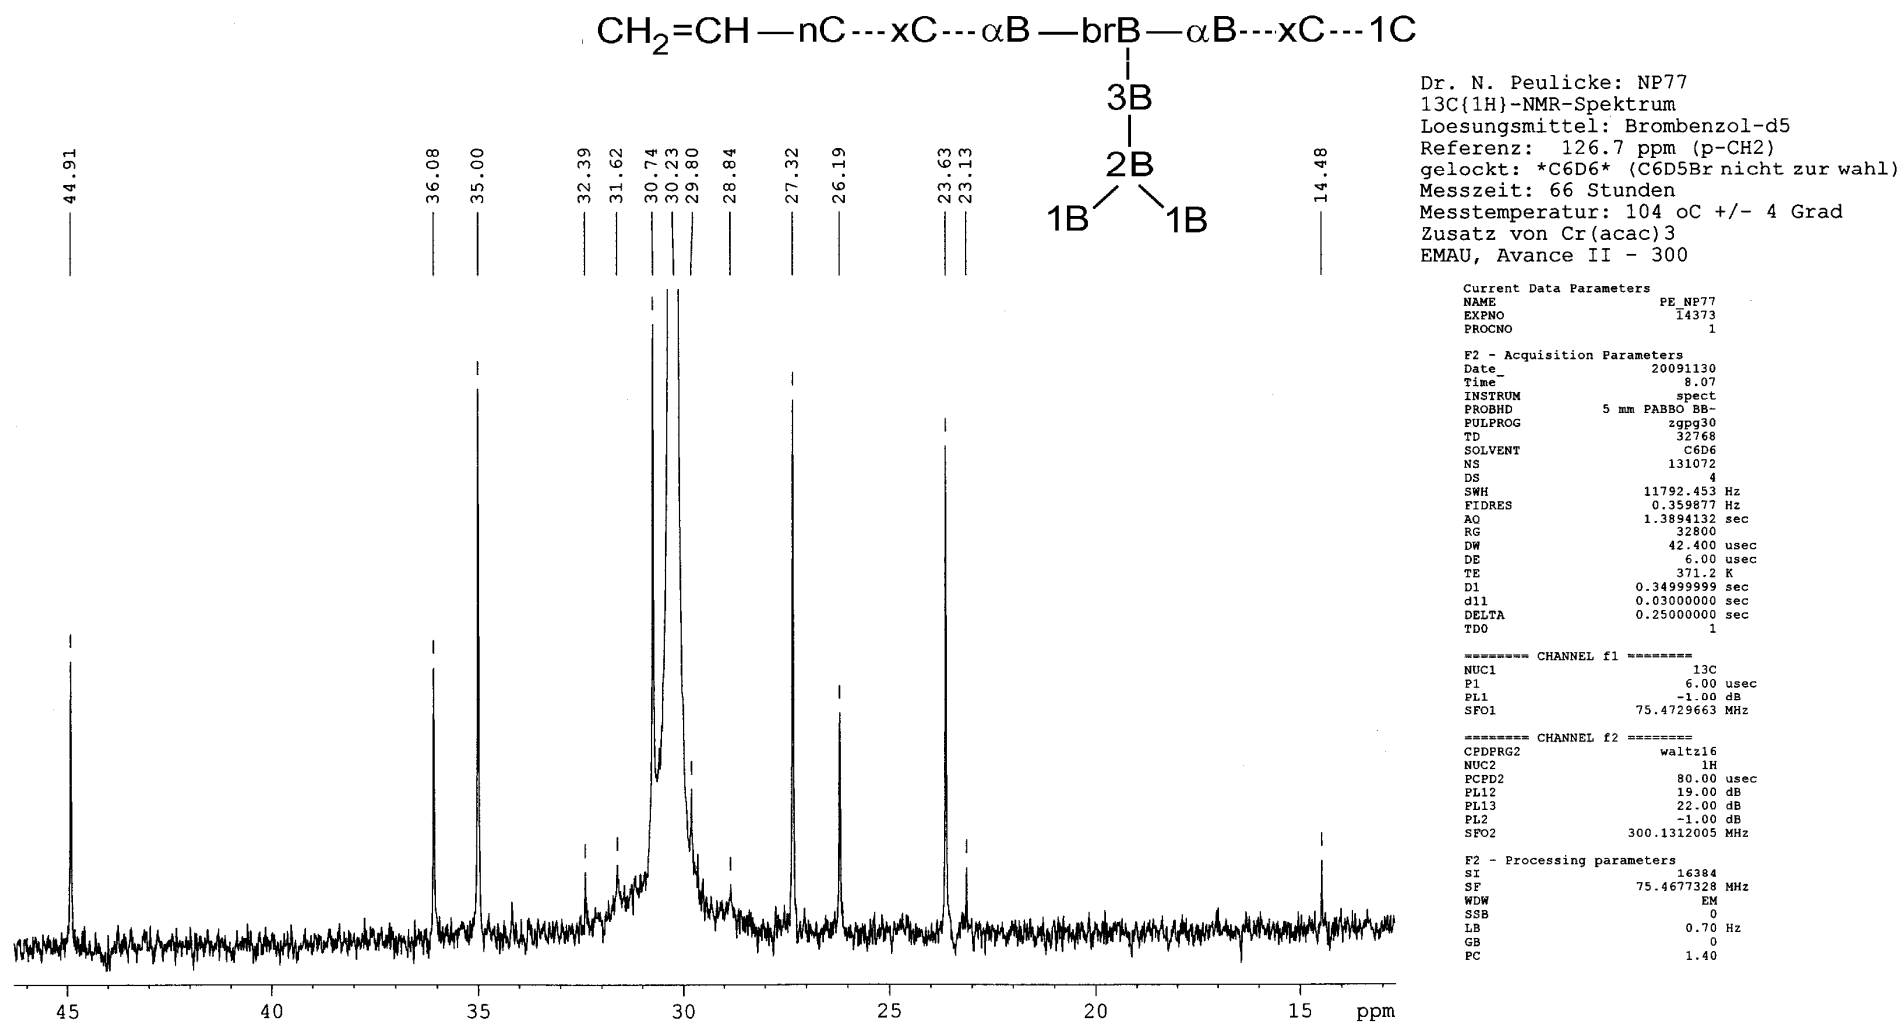

**Figure 2:**  $^1\text{H}$  NMR spectrum of poly(ethylene-co-styrene), obtained with catalyst **PPHH/Ni** in toluene (Table 1, entry 11).

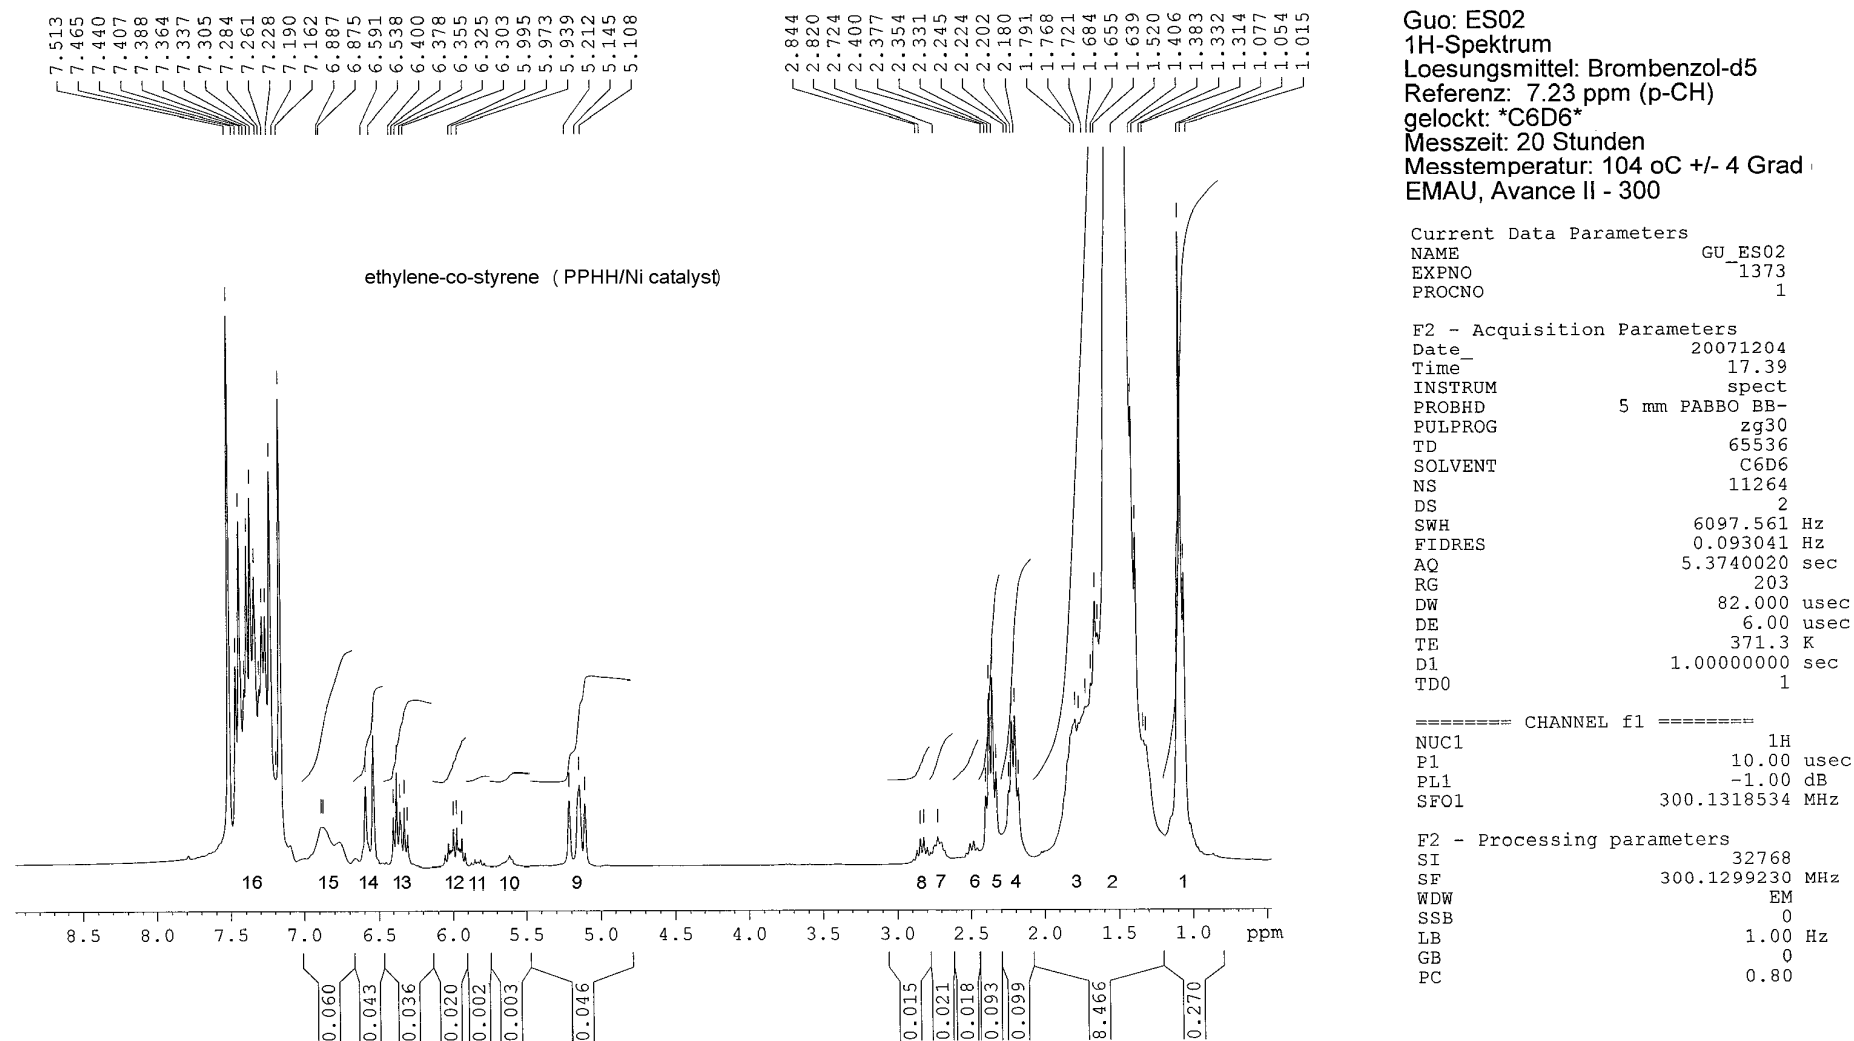

Assignment: 1  $\text{CH}_3$ , 2  $\text{CH}_2$ , 3  $\text{CHCH}_2$ , 4  $\text{RCH}=\text{CHCH}_2$  (R = H, alkyl), 5  $\text{PhCH}=\text{CHCH}_2$ , 6  $\text{CH}_2=\text{CHCH}_2$  (minor), 7  $\text{CH}_2\text{CHPhCH}_2$ , 8 (sextet) probably  $\text{PhMeCHCH}_2$ , 9  $\text{CH}=\text{CH}_2$ , 10  $\text{CH}=\text{CH}$ , 11  $\text{CH}_2=\text{CH}-\text{CH}_2\text{CHPh}$ , 12  $\text{CH}_2=\text{CHCH}_2\text{CH}_2$ , 13  $\text{PhCH}=\text{CHCH}_2$ , 14  $\text{PhCH}=\text{CHCH}_2$ , 15, 16  $\text{C}_6\text{H}_5$  and solvent signals.

**Figure 3:**  $^{13}\text{C}$  NMR spectrum of poly(ethylene-co-styrene), obtained with catalyst **CCHH/Ni** in toluene (Table 1, entry 12).

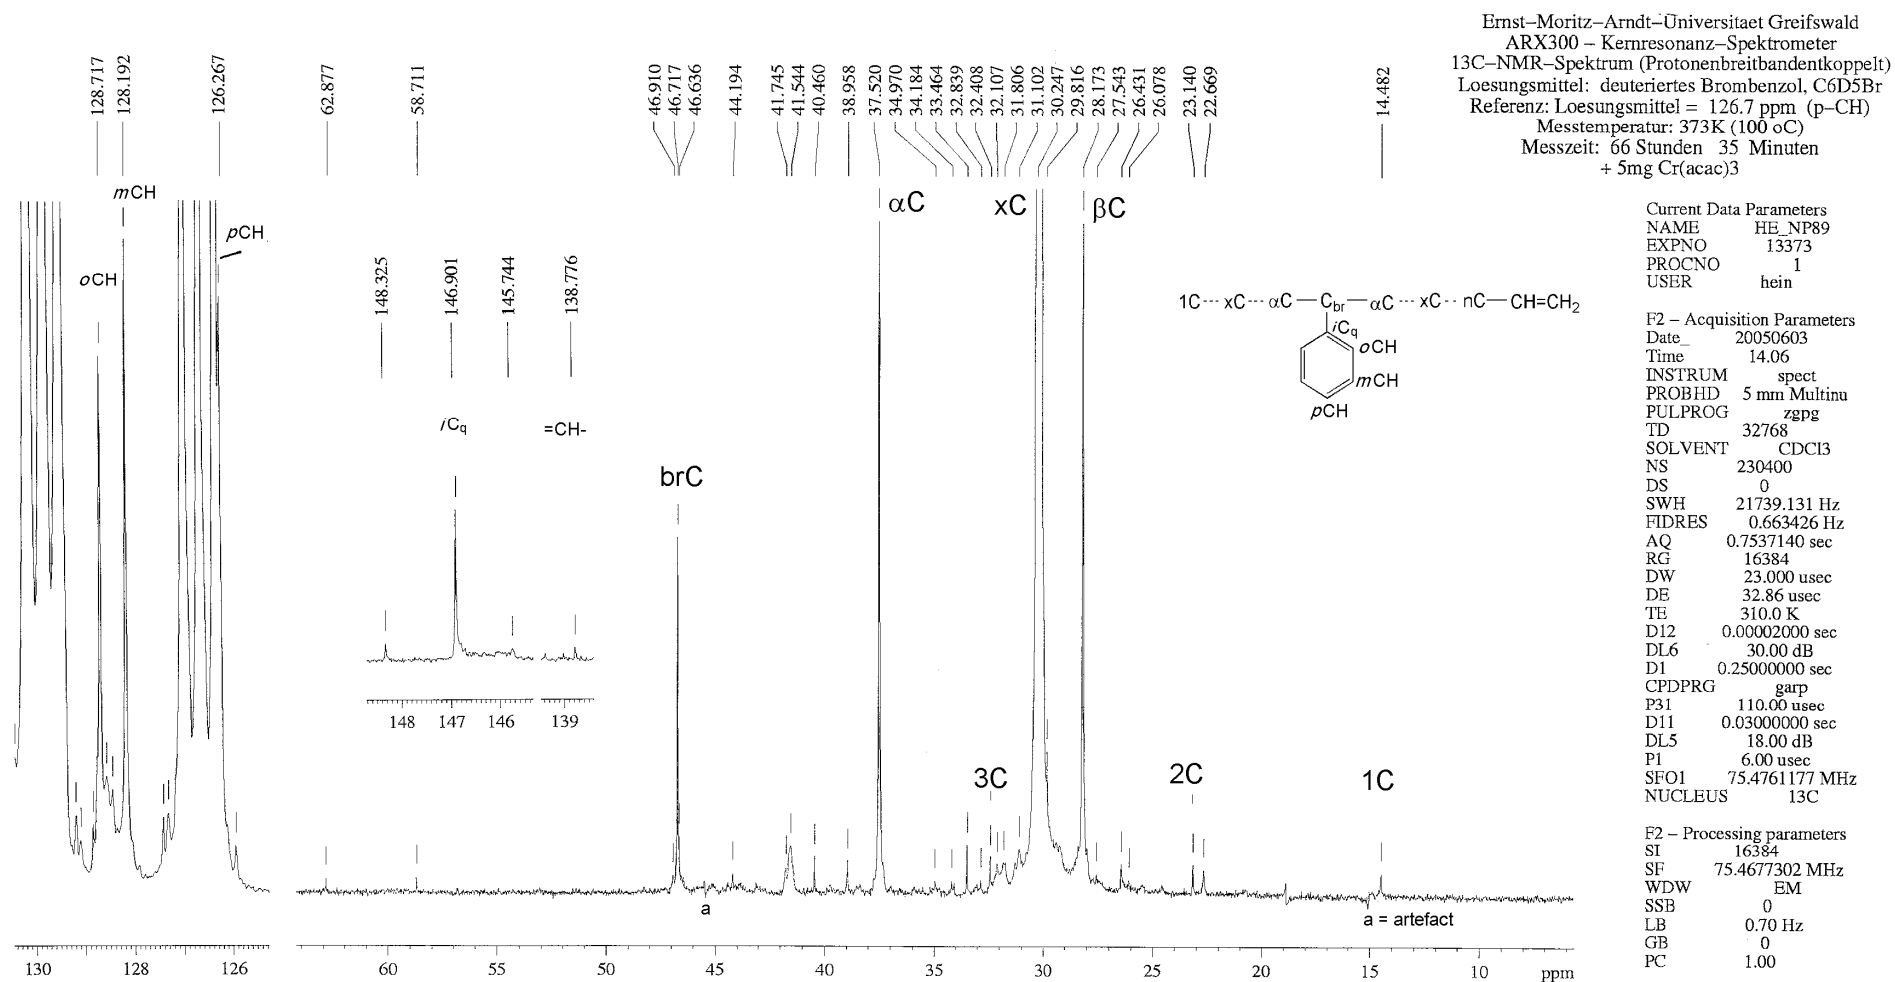

**Figure 4:**  $^{13}\text{C}$  NMR spectrum of poly(ethylene-co-allylbenzene), obtained with catalyst **CCHH/Ni** in toluene (Table 1, entry 14).

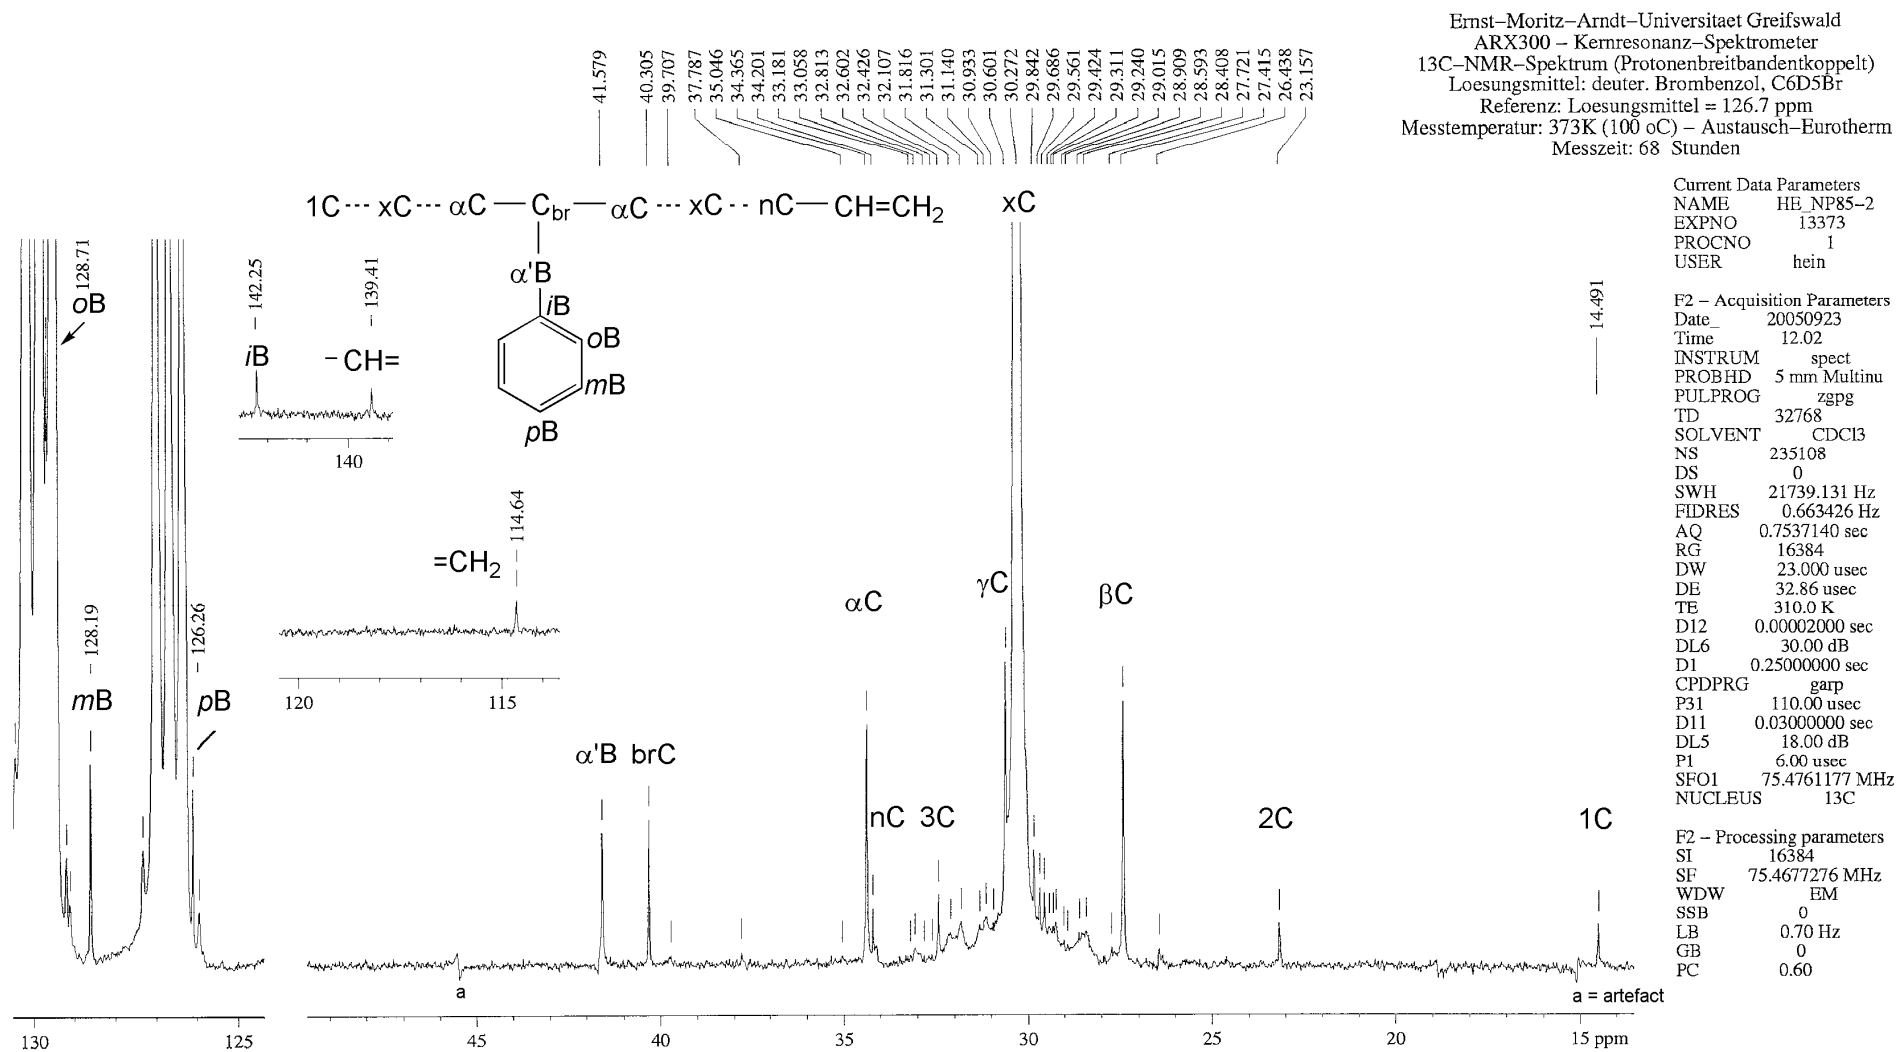

**Figure 5:**  $^1\text{H}$  NMR spectrum of poly(ethylene-co-ethyl undecenoate), obtained with catalyst **PPHH/Ni** in ethyl 1-undecenoate (Table 1, entry 16).

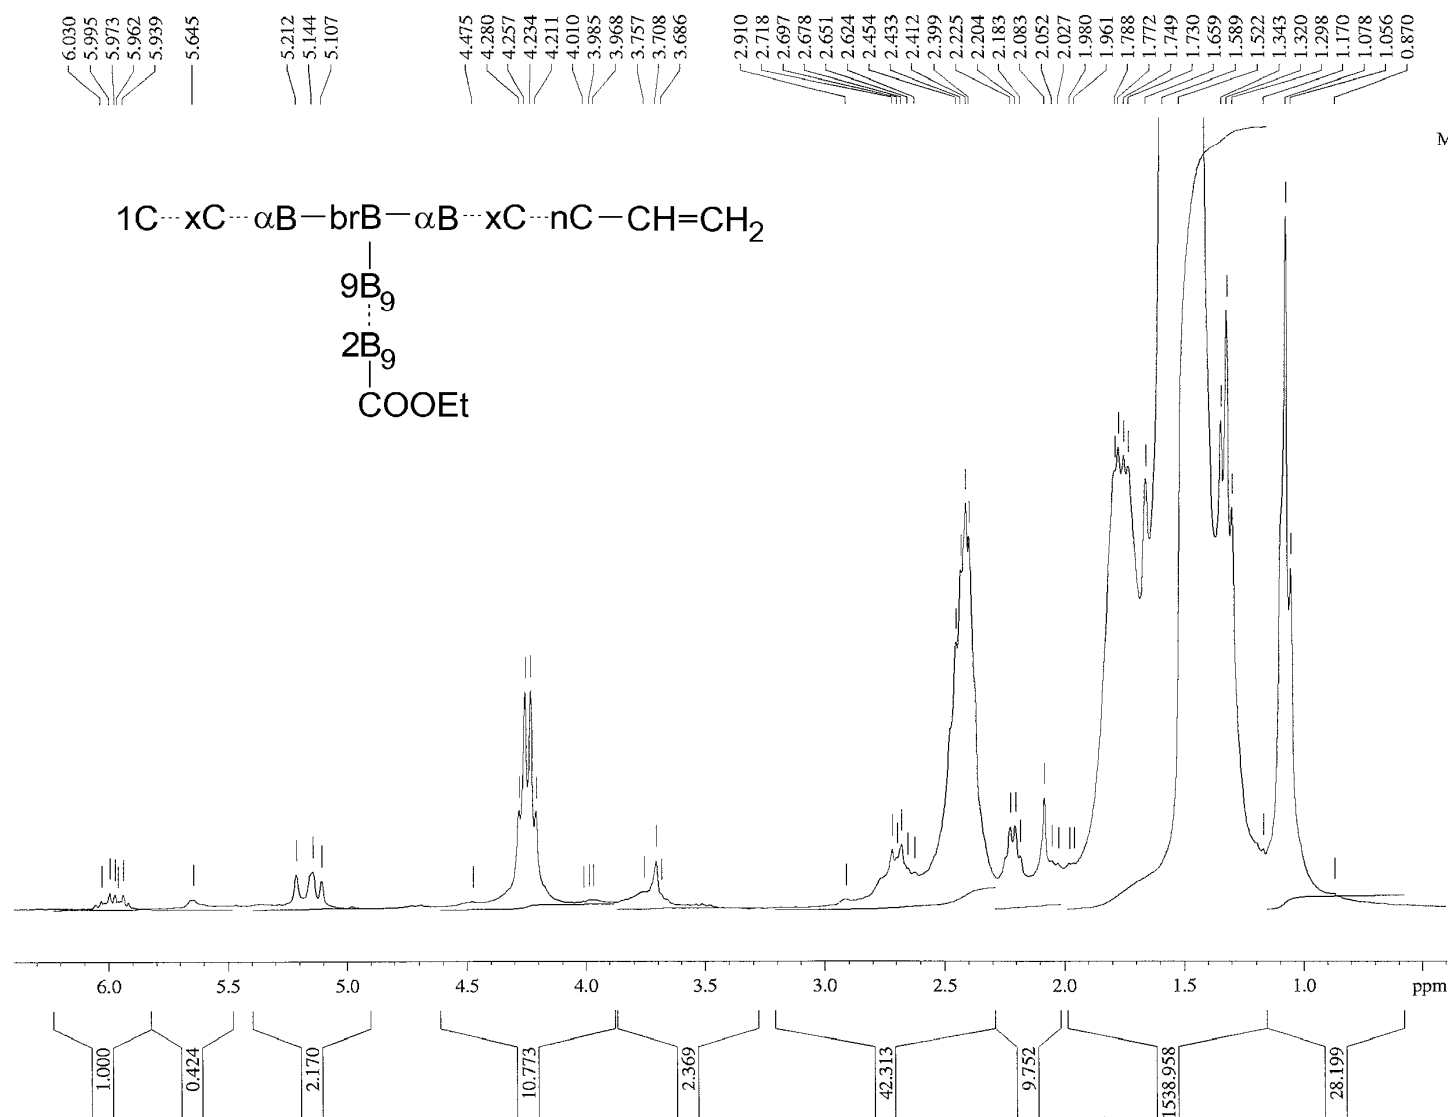

Ernst-Moritz-Arndt-Universität Greifswald  
 ARX300 – Kernresonanz-Spektrometer  
 $^1\text{H}$ -NMR-Spektrum  
 Prof. Dr. J. Heinicke: *NP53*  
 Lösungsmittel: Deuterobrombenzol,  $\text{C}_6\text{D}_5\text{Br}$   
 Referenz: Lösungsmittel = 7.23 ppm (P-CH)  
 Messtemperatur: 375K (100 °C) – Austausch-Eurotherm  
 Messzeit: 20 Stunden

Current Data Parameters  
 NAME HE\_NP53  
 EXPNO 1373  
 PROCNO 1  
 USER hein

F2 – Acquisition Parameters  
 Date\_ 20050922  
 Time 11.51  
 INSTRUM spect  
 PROBHD 5 mm Multinu  
 PULPROG zg  
 TD 65536  
 SOLVENT  $\text{CDCl}_3$   
 NS 11264  
 DS 0  
 SWH 6097.561 Hz  
 FIDRES 0.093041 Hz  
 AQ 5.3740020 sec  
 RG 1024  
 DW 82.000 usec  
 DE 102.50 usec  
 TE 300.0 K  
 D1 1.00000000 sec  
 P1 3.00 usec  
 SFO1 300.1322456 MHz  
 NUCLEUS  $^1\text{H}$

F2 – Processing parameters  
 SI 32768  
 SF 300.1300185 MHz  
 WDW EM  
 SSB 0  
 LB 1.00 Hz  
 GB 0  
 PC 0.50

**Figure 6:**  $^{13}\text{C}$  NMR spectrum of poly(ethylene-co-1-decen-9-ol), obtained with catalyst **CCHH/Ni** in toluene (Table 1, entry 19).

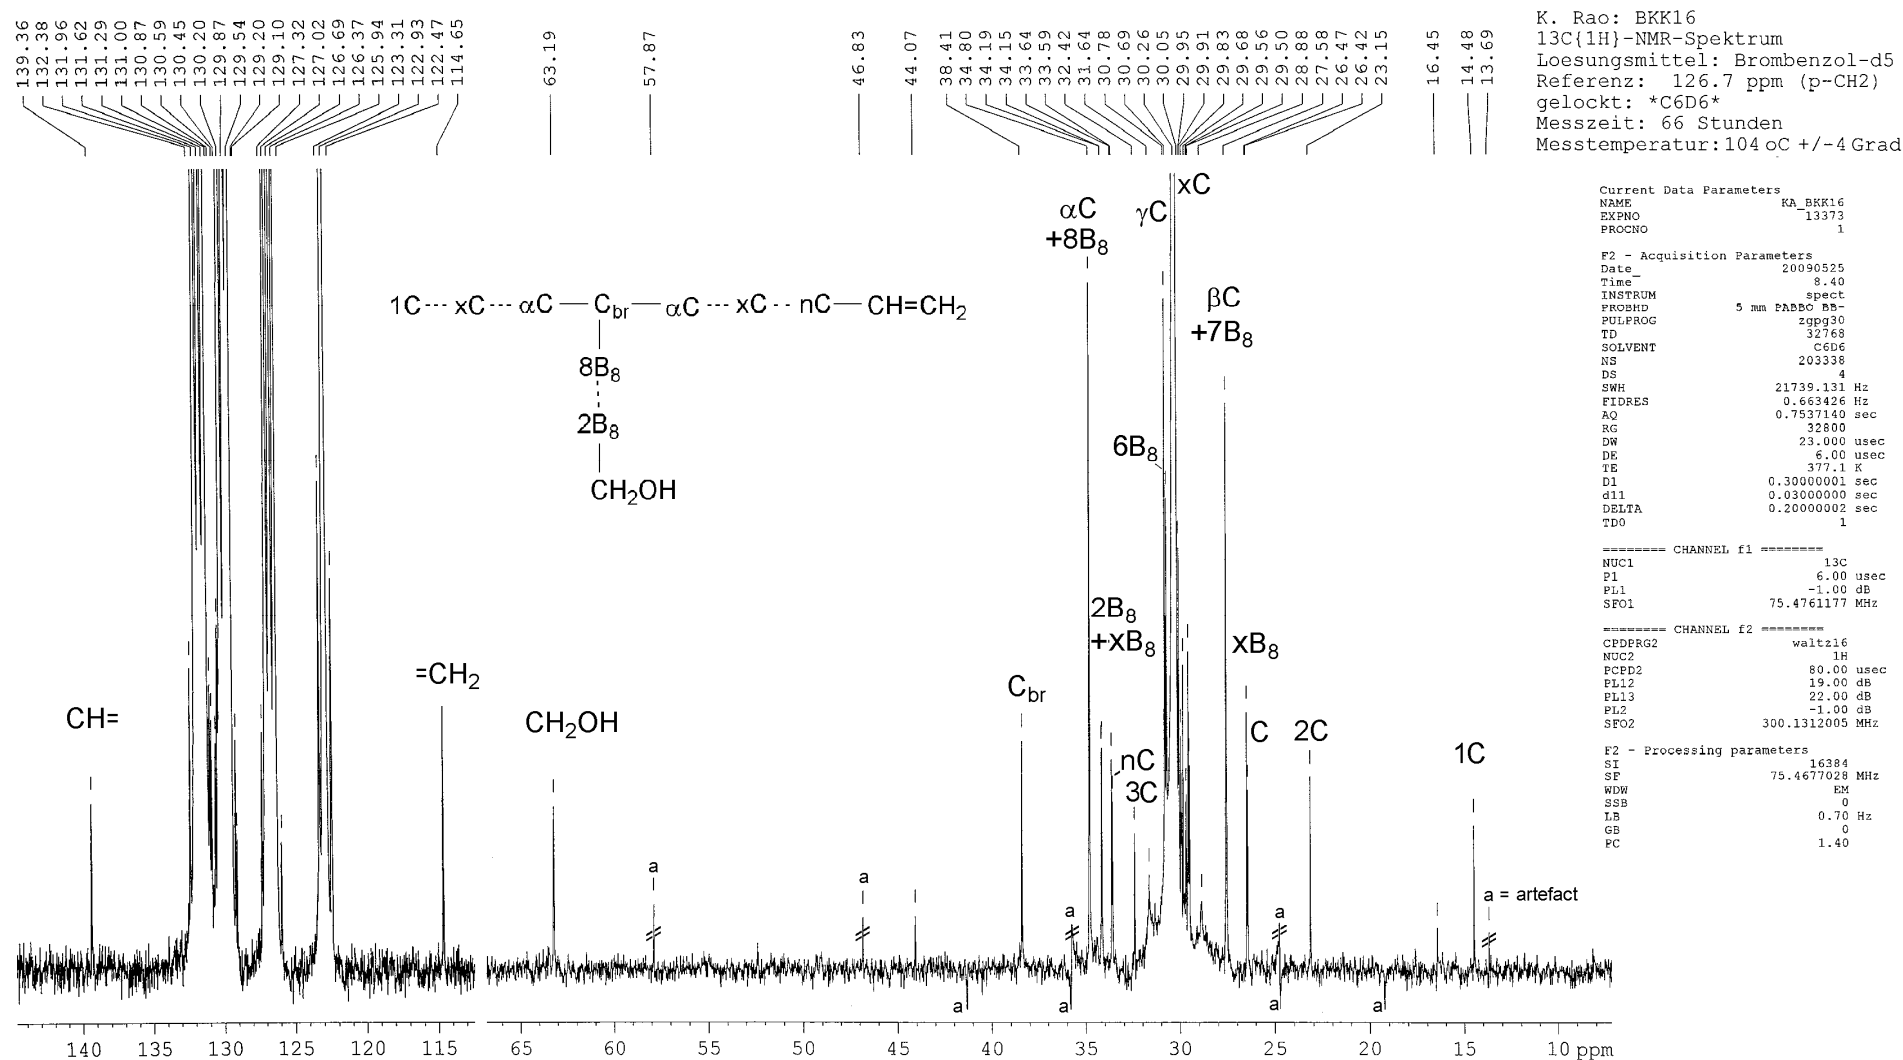

Supplement: Supplementary file 1 [file 4487956]
